# Supplementary material
Source: PubMed Central journal article supplement (PMC4239157)
Supplement: NIHMS634406-supplement-Methods_and_Materials.pdf [file NIHMS634406-supplement-Methods_and_Materials.pdf]

1 5-Lipoxygenase Pathway In Experimental Abdominal Aortic Aneurysms

2  
3  
4 Castigliano M Bhamidipati (1), Carl A Whatling (2), Gaurav S Mehta (3), Akshaya K  
5 Meher (1), Vanessa A Hajzus (1), Gang Su (4), Morgan Salmon (5), Gilbert R Upchurch  
6 Jr. (4, 6), Gary K Owens (5, 6), Gorav Ailawadi (1, 6, 7)

7  
8  
9 (1) Division of Thoracic and Cardiovascular Surgery, Department of Surgery,  
10 University of Virginia School of Medicine, Charlottesville, Virginia, USA

11 (2) Cardiovascular Disease Section, Bioscience Department, AstraZeneca R&D,  
12 Mölndal, Sweden

13 (3) Department of Surgery, University of Virginia School of Medicine, Charlottesville,  
14 Virginia, USA

15 (4) Division of Vascular and Endovascular Surgery, Department of Surgery,  
16 University of Virginia School of Medicine, Charlottesville, Virginia, USA

17 (5) Department of Molecular Physiology and Biological Physics, University of  
18 Virginia School of Medicine, Charlottesville, Virginia, USA

19 (6) Robert M Berne Cardiovascular Research Center, University of Virginia School of  
20 Medicine, Charlottesville, Virginia, USA

21 (7) Department of Biomedical Engineering, University of Virginia School of Medicine,  
22 Charlottesville, Virginia, USA

23  
24  
25 Corresponding Author: Gorav Ailawadi, Associate Professor of Surgery and Biomedical  
26 Engineering, Division of Thoracic and Cardiovascular Surgery, Departments of Surgery  
27 and Biomedical Engineering, University of Virginia Health System, P.O. Box 800679,  
28 Charlottesville, Virginia 22908, USA, Phone: 434-924-5052, Fax: 434-244-7588, Email:  
29 gorav@virginia.edu

30  
31  
32 Word Count: 3241

33  
34  
35 Subject Code:

36 [35] CV surgery: aortic and vascular disease

37 [97] Other Vascular biology

38 [130] Animal models of human disease

## 1 METHODS

2

## 3 Elastase perfusion model

4

5 The elastase perfusion model of abdominal aortic aneurysm formation in mice  
6 was utilized as previously described<sup>1-3</sup>. Congenic age, weight and gender matched  
7 male C57BL/6J (Stock #000664, Jackson Laboratories, Bar Harbor, Maine) (WT) or 5-  
8 LO-/- mice (Stock #004155, Jackson Laboratories, Bar Harbor, Maine) were used for  
9 experiments (N=16/group). 5-LO-/- mice have no externally visible abnormal  
10 phenotype. Mice underwent 75/1mg/kg intraperitoneal ketamine/medetomidine  
11 anesthesia. Aorta were perfused with either saline or elastase (Lot #078K7018, Sigma  
12 Aldrich Inc., St. Louis, Missouri) for 5 and a-half minutes<sup>4</sup>. Immediate mechanically  
13 induced aortic wall dilatation of 15-35% after perfusion with saline or elastase  
14 (0.47U/mL porcine pancreatic elastase) is followed by either no aneurysmal (perfused  
15 with saline) or aneurysmal (perfused with elastase) dilatation over 14 days. Mice were  
16 housed individually throughout experiments, and maintained at 70°F, 50% humidity, in  
17 12-hour light-dark cycles per institutional animal protocols. All mice were fed ad libitum  
18 water and placed on diet with no restrictions on movement. All mice had unlimited daily  
19 access to the chow (control or 5-LO admixed) ad libitum in their cage, and had no  
20 restrictions on movement. Video micrometry measurements of the maximum diameter  
21 of the aortic wall distal to the renal arteries were performed *in situ* before perfusion,  
22 following perfusion, and at the time of harvest using a Q-Color3 Optical Camera  
23 (Olympus Corp., Center Valley, Pennsylvania) attached to an operating microscope  
24 (Leica Microsystems, Bannockburn, Illinois) using QCapture Pro Software version 6.0  
25 (QImaging Inc., Surrey, Canada). Infrarenal aortic diameter that exceeded the baseline  
26 Infrarenal aortic measurement by 50% were considered aneurysmal across all  
27 experiments. Change in aortic dilatation from baseline (%) was calculated by  
28 subtracting the infrarenal control diameter from the infrarenal maximal diameter divided  
29 by the infrarenal control diameter as determined by video micrometry. At the time of  
30 harvest following antegrade perfusion, the entire infrarenal aorta was explanted. The  
31 aortas (or aneurysms, when present) were either: 1) snap frozen in liquid nitrogen for  
32 analyses by polymerase chain reactions or protein extraction, or 2) processed for  
33 histology or immunohistochemistry.

34

## 35 Angiotensin II infusion model

36

37 Osmotic pumps (Alzet<sup>®</sup> 2004, Durect Corp., Cupertino, California) containing  
38 either Ang II (1000 ng/kg/min, Sigma Aldrich Inc., St. Louis, Missouri) or saline were  
39 introduced in 10-week-old LDLr-/- male mice (Stock #002207, Jackson Laboratories,  
40 Bar Harbor, Maine) as previously described<sup>5,6</sup> (N=8/group). Mice were housed  
41 individually throughout experiments, and maintained at 70°F, 50% humidity, in 12-hour  
42 light-dark cycles per institutional animal protocols. All mice were fed ad libitum water  
43 and placed on high fat diet (TD 88137, Harlan Teklad Inc., Indianapolis, Indiana) with no  
44 restrictions on movement. All mice had unlimited daily access to the chow (control or 5-

1 LO admixed) ad libitum in their cage, and had no restrictions on movement.  
2 Aneurysmal segments of the aortas (proximal to the renal arteries) were harvested after  
3 28 days just like in the elastase perfusion model and processed for histology.  
4 Cardiovascular profile (heart rate, mean arterial pressure, systolic and diastolic blood  
5 pressure) was determined over 28 days. Conscious mice underwent measurements  
6 using Coda 8 (Kent Scientific Corporation, Torrington, Connecticut) tail-cuff system as  
7 described previously<sup>7</sup>. Acclimatization cycles (N=10) were discarded, and average of  
8 the ensuing cycles (N=20) are reported. Measurements were obtained for 7 days prior  
9 to exposure to the 5-LO inhibitor, and then subsequently on day 0, 1, 3, 5, 7, 10, 14, 21  
10 and 28 of Ang II infusion. At day 28, video micrometry measurements of the aortic wall  
11 diameter (proximal to the renal arteries) were performed *in situ* using a Q-Color3 Optical  
12 Camera (Olympus Corp., Center Valley, Pennsylvania) using QCapture Pro Software  
13 version 6.0 (QImaging Inc., Surrey, Canada). LDLr<sup>-/-</sup> mice (N=6) were harvested prior  
14 to experiments to establish baseline aortic diameters and based on these findings the  
15 0.5mm baseline aortic diameter size was determined. Video micrometry measurements  
16 were compared to a baseline aortic diameter of 0.5mm, which was established as the  
17 arbitrary baseline aortic diameter from age, gender and weight matched LDLr<sup>-/-</sup> mice  
18 that were harvested separately.

19

## 20 Pre-injury Pharmacological studies

21

22 All mice were single housed throughout experiments and exposed to 5-LO  
23 inhibitor admixed into chow for 5-7 days prior to injury (i.e.: elastase perfusion or Ang II  
24 infusion). AZD4407 (AstraZeneca PLC, London, UK), a unique potent orally available  
25 non-redox inhibitor of 5-LO that has greater than 800-fold selectivity over other  
26 lipoxygenases and cyclooxygenases was utilized for experiments<sup>8</sup>. Control chow and  
27 5-LO inhibitor admixture chow at 3 mg/kg, 10 mg/kg and 30 mg/kg for experiments were  
28 formulated either at AstraZeneca R&D (Mölndal, Sweden) or through Research Diets  
29 Inc. (New Brunswick, New Jersey) based on a baseline 25g mouse weight. All mice  
30 had unlimited daily access to the chow (control or 5-LO admixed) ad libitum in their  
31 cage, and had no restrictions on movement. Pre-exposure time points were selected  
32 based on *in vivo* 5-LO inhibitor PK levels, and LTB<sub>4</sub> production determined in  
33 preliminary experiments (data not shown). Mice were weighed routinely throughout  
34 elastase (Day -5, 0, 7, and 14) and Ang II experiments (Day -7, 0, 1, 3, 5, 7, 10, 14, 21  
35 and 28).

36

## 37 Post-injury Pharmacological studies

38

39 All mice were single housed throughout experiments and exposed to 5-LO  
40 inhibitor admixed into chow for 10 days after injury (i.e.: elastase perfusion). All mice  
41 had unlimited daily access to the chow (control or 5-LO admixed) ad libitum in their  
42 cage, and had no restrictions on movement. The post-injury time point was selected  
43 based on prior unpublished observations from our lab, which confirmed the presence of  
44 a small aneurysm at day 7 following elastase perfusion. Based on the pre-exposure

1 studies, we anticipate *in vivo* drug steady state to be reached by day 7 in mice exposed  
2 to the inhibitor at day 3 after elastase perfusion. Control chow and 5-LO inhibitor  
3 admixture chow at 3 mg/kg, 10 mg/kg and 30 mg/kg for experiments were formulated  
4 either at AstraZeneca R&D (Möln dal, Sweden) or through Research Diets Inc. (New  
5 Brunswick, New Jersey) based on a baseline 25g mouse weight.

#### 6 7 LTB<sub>4</sub> assay

8  
9 Whole blood obtained by cardiac puncture from mice (500 µl) using heparinized  
10 syringes and collection tubes containing 1 mg EDTA diluted in RPMI was incubated at  
11 37°C for 30 minutes. Samples were subsequently incubated at 37°C for 20 minutes  
12 with DMSO (control) or 25µM calcium ionophore (A23187, Sigma Aldrich Inc., St. Louis,  
13 Missouri). The reaction was stopped using 10 µM AZD4407 in PBS. Microtiter plates  
14 were centrifuged at 2000 rpm, 4°C for 10 minutes. Supernatants were stored at -80°C  
15 until further processing. LTB<sub>4</sub> enzyme immunoassay (EIA), plate reading by iMark™  
16 Microplate Absorbance Reader (Bio-Rad Laboratories Inc., Hercules, California), and  
17 calculations to quantify absorbance were completed per EIA manufacturer  
18 recommendations (Cayman Chemical Co., Ann Arbor, Michigan).

#### 19 20 Plasma 5-LO levels

21  
22 Whole blood obtained by cardiac puncture from mice using heparinized syringes  
23 and collection tubes containing 1 mg EDTA was centrifuged at 2500 rpm for 10 minutes,  
24 4°C. Plasma samples were stored at -20°C for further processing, and when ready  
25 were transferred to a pre-labeled plate for analysis by liquid chromatography mass  
26 spectrometry/ mass spectrometry (LC-MS/ MS) according to manufacturer's protocol  
27 (AstraZeneca R&D, Möln dal, Sweden).

#### 28 29 Plasma blood and urine metabolite profile

30  
31 Whole blood obtained by cardiac puncture from mice using heparinized syringes  
32 and collection tubes containing 1 mg EDTA was either immediately assayed for blood  
33 chemistry profiles or centrifuged at 2500 rpm for 10 minutes, 4°C. Complete blood  
34 count with differential in whole blood, and plasma cholesterol, high-density lipoprotein,  
35 and triglyceride levels were determined through the University of Virginia medical  
36 laboratories. Urine samples collected at day 14 following elastase perfusion studies  
37 were examined for urine LTE<sub>4</sub> by EIA per manufacturer's protocol (Cayman Chemical  
38 Co., Ann Arbor, Michigan).

#### 39 40 Adoptive transfer bone marrow transplantation

41  
42 Adoptive transfer bone marrow transplantation experiments were performed as  
43 previously described<sup>1, 2, 9</sup>. Briefly 6-week-old recipient mice were lethally irradiated and  
44 rescued through retro-orbital injection of 6 million bone marrow cells, isolated from

1 femurs of 6-week-old donor mice<sup>10</sup>. Mice were placed on antibiotic prophylaxis for 3  
2 weeks in their drinking water (2 weeks trimethoprim, 1 week flouroquinolone) following  
3 adoptive transfer, and then subsequently switched to regular drinking water. Non-  
4 rescued control mice died between days 7 and 10 following irradiation. Chimeric mice  
5 underwent blood DNA analysis, obtained from saphenous vein aspiration 4 weeks  
6 following adoptive transfer. LTB<sub>4</sub> production in blood samples was quantified at 10-  
7 weeks following adoptive transfer for additional verification of successful bone marrow  
8 transplantation. Chimeric mice then underwent elastase perfusion as described  
9 following a two-week recovery period (N=12/group).

#### 10 11 Gelatin zymography

12  
13 Snap-frozen murine AAA samples were analyzed by gelatin zymography.  
14 Protein was extracted after harvest using Lysing Matrix D (MP Biomedicals, Solon,  
15 Ohio) and 1M Tris (hydroxymethyl) aminomethane buffer at pH 7.5, 5M Sodium  
16 Chloride, 1M Calcium Chloride and Triton X-100 homogenized at 4°C, while  
17 concentration was determined using BCA protein assay kit (Thermo Scientific, Rockford,  
18 Illinois). Electrophoresis was completed using 0.1% gelatin in a 10% sodium dodecyl  
19 sulfate polyacrylamide gel using equivalent volume of each fraction. Enzymatic activity  
20 was visualized as negative staining with Coomassie Brilliant Blue R-250 (Thermo  
21 Scientific, Rockford, Illinois). Relative densitometry analysis of lytic bands, adjusted for  
22 background, indicative of MMP activity was performed using Gel Doc™ XR+ System  
23 and Image Lab™ software (Bio-Rad Laboratories Inc., Hercules, California).

#### 24 25 Histology, immunohistochemistry and confocal microscopy

26  
27 Murine aortas were harvested at sacrifice for histological analysis after undergoing left  
28 ventricular puncture and 4% paraformaldehyde (PFA) followed by phosphate buffered  
29 saline (PBS) antegrade perfusion at physiologic pressure. Further fixation was  
30 achieved by overnight incubation in 4% PFA at 4°C followed by paraffin embedding and  
31 sectioning at 5µm. Human and murine paraffin embedded samples underwent  
32 microwave antigen retrieval, antibodies were bound and detected using VectaStain Elite  
33 Kit (Vector Laboratories Inc., Burlingame, California). Murine samples were embedded  
34 in the same orientation based on the identifying ligature from the aortotomy sight. The  
35 specimens were sectioned at 5µm through the entire length of the aorta and mounted  
36 (approximately 120 slides per aorta harvested). Screening stains with Hematoxylin and  
37 Eosin (H&E) and Modified Russell-Movat Pentachrome (Movat) for elastin were  
38 completed. These slides were used to determined the area of interest for further  
39 staining. Then Hematoxylin and Eosin (H&E), along with Modified Russell-Movat  
40 Pentachrome (Movat) for elastin layers, luna and toluidine blue staining for mast cells,  
41 Verhoeff-Van Gieson staining for elastin layers, and immunohistochemical (IHC)  
42 staining was completed. Antibodies for IHC staining were anti-rat Mac2 for  
43 macrophages (Cedarlane Laboratories, Burlington, Canada), anti-mouse anti-Neutrophil  
44 (Ly 6B.2) for PMNLs (AbD Serotec, Oxford, United Kingdom), anti-mouse CD3ε (M-20)

1 for T-lymphocytes (Santa Cruz Biotechnology Inc., Santa Cruz, California), anti-mouse  
2 cleaved caspase-3 (Asp175) for apoptosis (Cell Signaling Technology, Inc., Danvers,  
3 Massachusetts), anti-mouse SMαA (14A) (Santa Cruz Biotechnology Inc., Santa Cruz,  
4 California), anti-rat 5-LOX (Cayman Chemical Co., Ann Arbor, Michigan), anti-human  
5 BLTr1 (Cayman Chemical Co., Ann Arbor, Michigan), and anti-human CysLT1 (Cayman  
6 Chemical Co., Ann Arbor, Michigan). Visualization color development was completed  
7 using diaminobenzidine (Dako Corporation, Carpinteria, California). Positive controls  
8 were included as per antibody manufacturer recommendations where paraffin  
9 embedded mouse organ sections specific to augment the antibody were stained (e.g.  
10 lymph node or spleen). A negative control included the same conditions, without the  
11 antibody being used. Conditions for both sets of controls (i.e. positive and negative)  
12 were first calibrated and then re-run with the slides of interest from our experiments.  
13 This process was repeated for each lot/batch # of antibody used per stain during every  
14 staining session. Images were acquired using AxioCam Software version 4.6 via 4X,  
15 10X, and 40X objectives and an AxioCam MRc camera (Carl Zeiss Inc., Thornwood,  
16 New York).

17

18 Paraffin sections were examined on a Zeiss LSM 510 confocal microscope  
19 equipped with purple diode laser for 405 nm excitation (blue); an argon laser with 458,  
20 477, 514, and 488 nm lines (blue-green); a 543 nm HeNe laser (red); and a 633 nm  
21 HeNe laser (far-red) (Carl Zeiss Inc., Thornwood, New York). IHC antibodies were  
22 optimized with appropriate fluorescently labeled detection antibodies (Alexa  
23 fluorophores, Life Technologies Inc., Grand Island, New York) and excited by lasers for  
24 acquisition through a 40X objective. ZEN lite 2011 (Carl Zeiss Inc., Thornwood, New  
25 York) software was used to analyze, merge images, and optically zoom to 300X.

26

## 27 Real-Time PCR

28

29 RNA from snap frozen mouse aortic samples was isolated with TRIzol<sup>®</sup>  
30 (Invitrogen Corp., Carlsbad, California) after homogenization according to the  
31 manufacturer's instructions. Total RNA quantification was determined using a  
32 NanoDrop Spectrophotometer (Thermo Scientific, Wilmington, Delaware).  
33 Subsequently 0.5µg complimentary deoxyribonucleic acid (cDNA) was synthesized from  
34 RNA using RNase H+ iScript reverse transcriptase (Bio-Rad Laboratories, Hercules,  
35 California). Then cDNA was amplified by qPCR on a MyiQ<sup>™</sup> Color Real-Time PCR  
36 Detection System (Bio-Rad Laboratories, Hercules, California). The 5-LO mutant (S: 5'-  
37 ATC GCC TTC TTG ACG AGT TC-3'), common (S: 5'-GCA GGA AGT GGC TAC TGT  
38 GGA-3') and wildtype (S: 5'-TGC AAC CCA GTA CTC ATC AAG-3') sequences were  
39 obtained from Jackson Laboratories, Bar Harbor, Maine. 5-LO pathway Taqman<sup>®</sup>  
40 primer and probe sets (Applied Biosystems Inc., Foster City, California) were used to  
41 study amplicons in the aneurysm tissue samples, and compared to the amplification of  
42 standards. Relative quantification with normalization to 18S using iQ5 optical system  
43 software, version 2.1 (Bio-Rad Laboratories, Hercules, California) was completed.  
44 Amplification by CFX96 Touch<sup>™</sup> Real-Time PCR Detection System (Bio-Rad

1 Laboratories, Hercules, California) was completed. Polymerase chain reactions  
2 amplified DNA transcripts of 5-LO and WT sequences in whole blood isolated from  
3 chimeric mice per manufacturer's recommendations (Qiagen Inc., Valencia, California).  
4 Amplicons were resolved on a 1-2% agarose gel and quantified by Gel Doc™ XR+  
5 System and Image Lab™ software (Bio-Rad Laboratories Inc., Hercules, California).  
6 We achieved near complete abrogation (99%) of the WT band in WT recipients of 5-  
7 LO-/- donor bone marrow cells. All fold changes were calculated by the method of  
8  $\Delta\Delta Ct$  and are expressed as mean $\pm$ sem compared with controls (as indicated).

#### 9 10 Immunohistochemistry quantification

11  
12 A circumferential area of interest (AOI) from IHC images was drawn to include  
13 the media and adventitial layers of the aorta. Threshold gated positive signal was  
14 detected within the AOI and quantified using Image-Pro Plus version 7.0 (Media  
15 Cybernetics Inc., Bethesda, Maryland).

#### 16 17 Cytokine measurements

18  
19 Plasma samples collected and stored at -80°C underwent quantification by  
20 mouse cytokine multiplex immunoassay (Bio-Rad Laboratories, Hercules, California)  
21 according to manufacturer's protocol.

#### 22 23 Human Samples

24  
25 Male patients between the age of 55 and 75 years who underwent open elective  
26 aneurysmectomy for infrarenal AAA were identified, and tissue was taken from the  
27 anterior or lateral wall (N=9/group). De-identified (per IRB protocol) control abdominal  
28 aorta samples were obtained from organ donors between the age of 15 and 35 without  
29 clinical or macroscopic signs of aortic atherosclerosis at The University of Virginia,  
30 Charlottesville, Virginia. There are inherent limitations to interpreting results from  
31 comparisons between these two groups.

#### 32 33 Study approval

34  
35 Animal care and use were in accordance with the *Guide for the Care and Use of*  
36 *Laboratory Mice*<sup>11</sup>. The animal protocol was approved by the University of Virginia  
37 Institutional Animal Care and Use Committee (#3634) in compliance with the Office of  
38 Laboratory Animal Welfare<sup>12</sup>. Approvals for human sample investigations, including  
39 patient consent waiver, was obtained by the Human Investigation Committee at The  
40 University of Virginia, Charlottesville, Virginia (HSR #13178).

#### 41 42 Statistics

43

1 Statistical analysis was performed using GraphPad Prism 5.0f for Mac OSX software  
2 (GraphPad Software, La Jolla, CA). Aortic dilation between groups was compared by  
3 single factor analysis of variance. When multiple groups were compared post hoc  
4 Tukey corrections were made to reduce false discovery rate. Histology and serology  
5 groups were compared using nonparametric 2-tailed *Mann-Whitney U* tests or by  $\chi^2$  as  
6 appropriate (as no parametric distribution of the data was assumed). Survival was  
7 computed using Kaplan Meier plots, and compared by log rank tests. Comparisons  
8 were made against controls and considered statistically significant when *P* value was  
9 equal to or less than 0.05. Numbers of mice per group used in experiments are shown  
10 in each figure, or within the methods section. Data are presented as mean $\pm$ sem.

11

12



## 1 REFERENCES

- 2
- 3 1. Pyo R, Lee JK, Shipley JM, Curci JA, Mao D, Ziporin SJ, Ennis TL, Shapiro SD,  
4 Senior RM and Thompson RW. Targeted gene disruption of matrix  
5 metalloproteinase-9 (gelatinase B) suppresses development of experimental  
6 abdominal aortic aneurysms. *J Clin Invest.* 2000;105:1641-1649.
- 7 2. Moehle CW, Bhamidipati CM, Alexander MR, Mehta GS, Irvine JN, Salmon M,  
8 Upchurch GR, Jr., Kron IL, Owens GK and Ailawadi G. Bone marrow-derived  
9 MCP1 required for experimental aortic aneurysm formation and smooth muscle  
10 phenotypic modulation. *J Thorac Cardiovasc Surg.* 2011;142:1567-1574.
- 11 3. Ailawadi G, Moehle CW, Pei H, Walton SP, Yang Z, Kron IL, Lau CL and Owens  
12 GK. Smooth muscle phenotypic modulation is an early event in aortic aneurysms.  
13 *J Thorac Cardiovasc Surg.* 2009;138:1392-1399.
- 14 4. Curci JA and Thompson RW. Variable induction of experimental abdominal aortic  
15 aneurysms with different preparations of porcine pancreatic elastase. *J Vasc  
16 Surg.* 1999;29:385.
- 17 5. Daugherty A and Cassis L. Chronic angiotensin II infusion promotes  
18 atherogenesis in low density lipoprotein receptor *-/-* mice. *Ann N Y Acad Sci.*  
19 1999;892:108-118.
- 20 6. Daugherty A and Cassis L. Angiotensin II and abdominal aortic aneurysms. *Curr  
21 Hypertens Rep.* 2004;6:442-446.
- 22 7. Daugherty A, Rateri D, Hong L and Balakrishnan A. Measuring blood pressure in  
23 mice using volume pressure recording, a tail-cuff method. *Journal of visualized  
24 experiments : JoVE.* 2009;27:1291.
- 25 8. Alcaraz ML, Atkinson S, Cornwall P, Foster AC, Gill DM, Humphries LA, Keegan  
26 PS, Kemp R, Merifield E, Nixon RA, Noble AJ, O'Beirne D, Patel ZM, Perkins J,  
27 Rowan P, Sadler P, Singleton JT, Tornos J, Watts AJ and Woodland IA. Efficient  
28 Syntheses of AZD4407 via Thioether Formation by Nucleophilic Attack of  
29 Organometallic Species on Sulphur. *Org Process Res Dev.* 2005;9:555-569.
- 30 9. Xiao J, Angsana J, Wen J, Smith SV, Park PW, Ford ML, Haller CA and Chaikof  
31 EL. Syndecan-1 displays a protective role in aortic aneurysm formation by  
32 modulating T cell-mediated responses. *Arterioscler Thromb Vasc Biol.*  
33 2012;32:386-396.
- 34 10. Huo Y, Zhao L, Hyman MC, Shashkin P, Harry BL, Burcin T, Forlow SB, Stark  
35 MA, Smith DF, Clarke S, Srinivasan S, Hedrick CC, Pratico D, Witztum JL, Nadler  
36 JL, Funk CD and Ley K. Critical role of macrophage 12/15-lipoxygenase for  
37 atherosclerosis in apolipoprotein E-deficient mice. *Circulation.* 2004;110:2024-  
38 2031.
- 39 11. Institute of Laboratory Animal Research Commission on Life Sciences NRC.  
40 *Guide for the Care and Use of Laboratory Animals.* 8th ed. Washington, DC: The  
41 National Academies Press; 2011.
- 42 12. *ARENA/OLAW IACUC Guidebook.* 2nd ed. Bethesda, MD: National Institutes of  
43 Health; 2002.
- 44
